# Supplementary material for: Exploring the Potential of Supercritical Fluid Extraction of Matricaria chamomilla White Ray Florets as a Source of Bioactive (Cosmetic) Ingredients
Source: MDPI journal article supplement (doi:10.3390/antiox12051092), 2023-05-12
Supplement: s1 [file s1]

**Table S1.** Chemical composition of separated volatile compounds from *Matricaria chamomilla* white ray floret supercritical fluid extracts.

| V <sup>c</sup> | Compound <sup>b</sup>        | RI <sup>a</sup> | Amount mg mL <sup>-1</sup> $\alpha$ -bisabolol equivalents |           |           |           |           |           |           |           |           |           |           |           |           | Class                  |
|----------------|------------------------------|-----------------|------------------------------------------------------------|-----------|-----------|-----------|-----------|-----------|-----------|-----------|-----------|-----------|-----------|-----------|-----------|------------------------|
|                |                              |                 | FAF1                                                       | FAF 2     | FAF 3     | FAF4      | FAF5      | FAF6      | FAF7      | FAF8      | FAF 9     | FAF10     | FAF11     | FAF12     | FAF13     |                        |
| 1              | Limonene                     | 1030            | 0.20±0.02                                                  | -         | 0.40±0.03 | 0.02±0.00 | 0.12±0.02 | 0.37±0.04 | 0.29±0.03 | 0.15±0.01 | 0.05±0.01 | 0.25±0.02 | 0.26±0.02 | 0.41±0.02 | 0.17±0.02 | Monoterpenes           |
| 2              | Artemisia alcohol            | 1084            | 0.01±0.00                                                  | -         | 0.01±0.00 | 0.01±0.00 | 0.01±0.00 | 0.02±0.01 | 0.01±0.00 | -         | -         | -         | 0.01±0.00 | -         | -         | Carboxylic acid esters |
| 3              | (E)- $\beta$ -Farnesene      | 1444            | 1.13±0.11                                                  | -         | 0.13±0.02 | -         | 0.38±0.03 | 1.78±0.13 | 1.30±0.21 | 1.44±0.09 | 0.15±0.02 | 1.90±0.21 | 1.61±0.17 | 3.64±0.54 | 1.38±0.23 | Sesquiterpenoids       |
| 4              | Germacrene D                 | 1481            | 0.10±0.01                                                  | -         | 0.01±0.00 | -         | 0.02±0.01 | 0.13±0.01 | 0.09±0.01 | 0.16±0.01 | 0.01±0.00 | 0.14±0.01 | 0.15±0.01 | 0.29±0.01 | 0.09±0.02 | Sesquiterpenoids       |
| 5              | Elixene                      | 1485            | 0.05±0.01                                                  | -         | 0.01±0.00 | 0.01±0.00 | -         | 0.05±0.01 | 0.04±0.01 | 0.09±0.01 | -         | -         | 0.07±0.01 | -         | -         | Sesquiterpenoids       |
| 6              | E-Nerolidol                  | 1564            | -                                                          | -         | -         | -         | -         | -         | -         | -         | -         | -         | -         | 0.16±0.02 | -         | Sesquiterpenoids       |
| 7              | Spathulenol                  | 1576            | 0.06±0.01                                                  | -         | -         | -         | 0.01±0.00 | 0.10±0.01 | 0.06±0.01 | 0.06±0.01 | 0.01±0.00 | 0.63±0.04 | 0.08±0.01 | 2.21±0.18 | 0.30±0.02 | Sesquiterpenoids       |
| 8              | Caryophyllene oxide          | 1581            | -                                                          | -         | -         | -         | -         | -         | -         | -         | -         | -         | -         | 0.14±0.02 | -         | Sesquiterpenoids       |
| 9              | $\alpha$ -Bisabolol oxide B  | 1655            | 0.28±0.03                                                  | 0.10±0.01 | 0.01±0.00 | -         | 0.06±0.01 | 0.41±0.03 | 0.27±0.02 | 0.34±0.02 | 0.04±0.01 | 2.06±0.15 | 0.38±0.02 | 5.69±0.84 | 1.05±0.06 | Tetrahydrofurans       |
| 10             | $\alpha$ -Bisabolol          | 1668            | -                                                          | -         | -         | -         | -         | -         | -         | -         | -         | 0.08±0.01 | -         | 0.32±0.02 | 0.04±0.01 | Sesquiterpenoids       |
| 11             | $\alpha$ -Bisabolone oxide A | 1679            | 0.22±0.02                                                  | 0.06±0.00 | -         | -         | 0.04±0.01 | 0.30±0.02 | 0.20±0.02 | 0.30±0.02 | 0.03±0.00 | 1.21±0.12 | 0.30±0.02 | 3.26±0.66 | 0.61±0.08 | Tetrahydrofurans       |
| 12             | Herniarin                    | 1732            | -                                                          | -         | -         | -         | -         | -         | -         | -         | -         | -         | -         | 0.22±0.02 | -         | Coumarins              |
| 13             | $\alpha$ -Bisabolol oxide A  | 1744            | 0.24±0.03                                                  | 0.12±0.02 | 0.01±0.00 | -         | 0.05±0.01 | 0.44±0.03 | 0.21±0.02 | 0.20±0.01 | 0.04±0.01 | 2.25±0.34 | 0.32±0.01 | 6.22±0.72 | 1.22±0.14 | Tetrahydrofurans       |
| 14             | cis-ene-yne-Dicycloether     | 1849            | 0.37±0.05                                                  | 0.21±0.03 | 0.01±0.00 | -         | 0.06±0.01 | 0.67±0.03 | 0.33±0.01 | 0.28±0.01 | 0.02±0.00 | 3.13±0.65 | 0.48±0.02 | 9.02±1.02 | 1.65±0.07 | Spiroethers            |
| 15             | E-En-yn-dicycloether         | 1902            | 0.07±0.01                                                  | 0.05±0.01 | -         | -         | 0.04±0.01 | 0.13±0.02 | 0.06±0.01 | 0.05±0.01 | 0.01±0.00 | 0.69±0.18 | 0.09±0.01 | 2.40±0.09 | 0.39±0.02 | Spiroethers            |
| 16             | (E)-Tibetin spiroether       | 1961            | -                                                          | -         | -         | -         | -         | -         | -         | -         | -         | 0.09±0.01 | -         | 0.31±0.02 | 0.05±0.01 | Spiroethers            |
| 17             | Palmitic acid                | 1968            | -                                                          | -         | -         | -         | -         | -         | -         | -         | -         | -         | -         | 0.83±0.05 | -         | Fatty acids            |
| 18             | Ethyl palmitate              | 1993            | -                                                          | -         | -         | -         | -         | -         | -         | -         | -         | 0.08±0.01 | -         | 0.25±0.01 | 0.06±0.01 | Fatty acid esters      |
| 19             | Ethyl linoleate              | 2162            | 0.01±0.00                                                  | -         | -         | -         | -         | 0.02±0.01 | -         | -         | -         | 0.16±0.01 | 0.01±0.00 | 0.39±0.02 | 0.11±0.02 | Fatty acid esters      |
| 20             | Ethyl oleate                 | 2173            | -                                                          | -         | -         | -         | -         | -         | -         | -         | -         | 0.13±0.01 | -         | 0.23±0.03 | 0.08±0.01 | Fatty acid esters      |
| 21             | Linoleic acid                | 2133            | -                                                          | -         | -         | -         | -         | -         | -         | -         | -         | 0.12±0.01 | -         | 1.54±0.14 | 0.07±0.01 | Fatty acids            |
| 22             | Matricarin                   | 2310            | -                                                          | -         | -         | -         | -         | -         | -         | -         | -         | -         | -         | 0.14±0.02 | -         | Lactones               |
| 23             | Heineicosane                 | 2100            | 0.01±0.00                                                  | -         | -         | -         | -         | 0.04±0.01 | 0.01±0.00 | -         | -         | 0.09±0.01 | 0.02±0.01 | 0.13±0.01 | 0.08±0.01 | Hydrocarbons           |
| 24             | Tetracosane                  | 2400            | 0.28±0.02                                                  | 0.14±0.02 | 0.01±0.00 | 0.01±0.00 | 0.09±0.01 | 0.54±0.09 | 0.24±0.02 | 0.18±0.02 | -         | 0.24±0.02 | 0.36±0.03 | 0.32±0.02 | 0.22±0.01 | Hydrocarbons           |
| 25             | Hexacosane                   | 2600            | 1.19±0.18                                                  | -         | 0.04±0.00 | 0.01±0.00 | 0.09±0.01 | 1.17±0.11 | 0.66±0.04 | 2.92±0.16 | -         | -         | 2.05±0.38 | -         | -         | Hydrocarbons           |
| 26             | Heptacosane                  | 2700            | 0.51±0.06                                                  | 0.05±0.01 | 0.01±0.00 | 0.01±0.00 | 0.08±0.01 | 0.69±0.03 | 0.33±0.01 | 0.96±0.08 | -         | 0.09±0.02 | 0.83±0.20 | -         | 0.08±0.01 | Hydrocarbons           |
| 27             | Octacosane                   | 2800            | 0.71±0.02                                                  | -         | -         | -         | 0.04±0.01 | 0.48±0.07 | 0.28±0.01 | 2.07±0.45 | -         | -         | 1.28±0.14 | -         | -         | Hydrocarbons           |
| 28             | Pentacosane-6,8-dione        | 2781            | 0.05±0.01                                                  | -         | -         | -         | -         | 0.05±0.01 | 0.02±0.00 | 0.12±0.02 | -         | 0.11±0.01 | 0.09±0.00 | 0.47±0.2  | 0.11±0.01 | Beta-diketones         |
| 29             | Campesterol                  | 3131            | -                                                          | -         | -         | -         | -         | -         | -         | -         | -         | -         | -         | 0.27±0.01 | -         | Phytosterol            |
| 30             | Stigmasterol                 | 3170            | 0.17±0.02                                                  | 0.37±0.01 | 0.04±0.00 | 0.05±0.01 | -         | 0.10±0.00 | 0.05±0.01 | 0.15±0.01 | 0.18±0.02 | 0.71±0.05 | 0.13±0.01 | 3.05±0.26 | 0.63±0.05 | Phytosterol            |
| 31             | $\beta$ -Sitosterol          | 3200            | 0.06±0.01                                                  | 0.23±0.01 | -         | 0.05±0.01 | -         | -         | -         | -         | 0.09±0.01 | 0.32±0.02 | -         | 1.15±0.08 | 0.30±0.04 | Phytosterol            |
| 32             | Lupeol                       | 3270            | 0.63±0.05                                                  | 1.61±0.13 | 0.09±0.01 | 0.29±0.02 | 0.32±0.02 | 0.44±0.03 | 0.35±0.02 | 0.10±0.01 | 3.89±0.26 | 3.52±0.22 | 0.27±0.02 | 4.93±0.41 | 3.21±0.52 | Triterpenes            |
| 33             | $\beta$ -Amyrin              | 3337            | 0.04±0.00                                                  | 0.09±0.01 | -         | -         | -         | -         | -         | 0.06±0.01 | 0.59±0.13 | 0.39±0.03 | 0.03±0.00 | 1.16±     | 0.36±0.01 | Triterpenes            |
| 34             | $\alpha$ -Amyrin             | 3376            | 0.21±0.01                                                  | 0.48±0.02 | -         | 0.05±0.01 | 0.14±0.02 | 0.28±0.01 | -         | 0.06±0.01 | 3.51±0.56 | 1.94±0.34 | 0.17±0.01 | 4.79±0.23 | 1.83±0.26 | Triterpenes            |
| 35             | Lupenone                     | 3384            | 1.13±0.07                                                  | 3.46±0.32 | 0.16±0.02 | 0.63±0.05 | 0.40±0.04 | 0.56±0.03 | 0.50±0.03 | -         | 4.35±0.32 | 3.78±0.44 | 0.28±0.02 | 4.75±0.31 | 3.59±0.37 | Triterpenes            |
| 36             | Lupeol acetate               | 3525            | 0.04±0.00                                                  | 0.05±0.01 | -         | -         | -         | 0.07±0.01 | 0.02±0.00 | -         | 0.05±0.00 | 0.28±0.02 | 0.04±0.00 | 0.74±0.12 | 0.24±0.02 | Triterpenes            |
| 37             | Betulin aldehyde             | 3629            | 0.07±0.01                                                  | 0.10±0.01 | -         | -         | -         | 0.12±0.02 | 0.06±0.01 | -         | 0.08±0.01 | 0.41±0.03 | 0.06±0.01 | 1.09±0.25 | 0.38±0.01 | Triterpenes            |

<sup>c</sup>V – Volatile organic compounds. <sup>a</sup>Retention indexes (RI) determined on the HP-5MS capillary column. <sup>b</sup>Based on NIST (National Institute of Standards and Technology) MS Search 2.2 library. A blank indicates that the compound has not been detected.
