# Supplementary material for: Exploring the Potential of Supercritical Fluid Extraction of Matricaria chamomilla White Ray Florets as a Source of Bioactive (Cosmetic) Ingredients
Source: MDPI journal article supplement (doi:10.3390/antiox12051092), 2023-05-12
Supplement: s1 [file s1]

**Figure S1.** GC-MS mass spectra for all identified compounds in *Matricaria chamomilla* white ray floret supercritical fluid extracts according to Supplementary table S1.

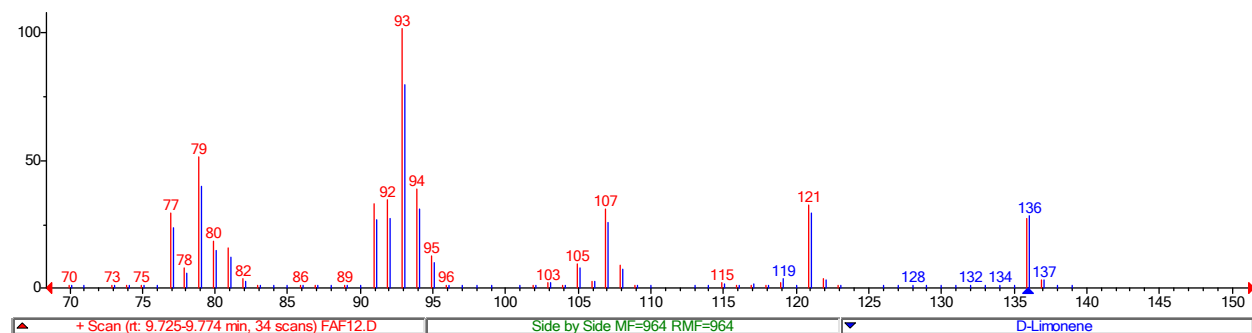

V1

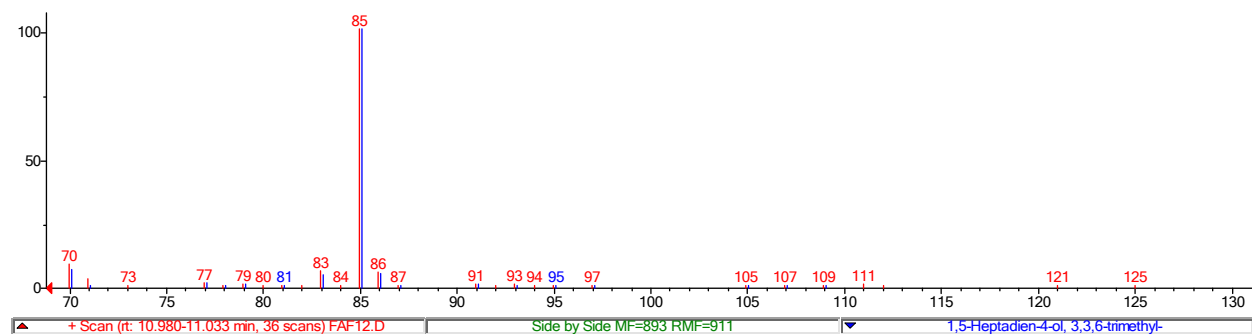

V2

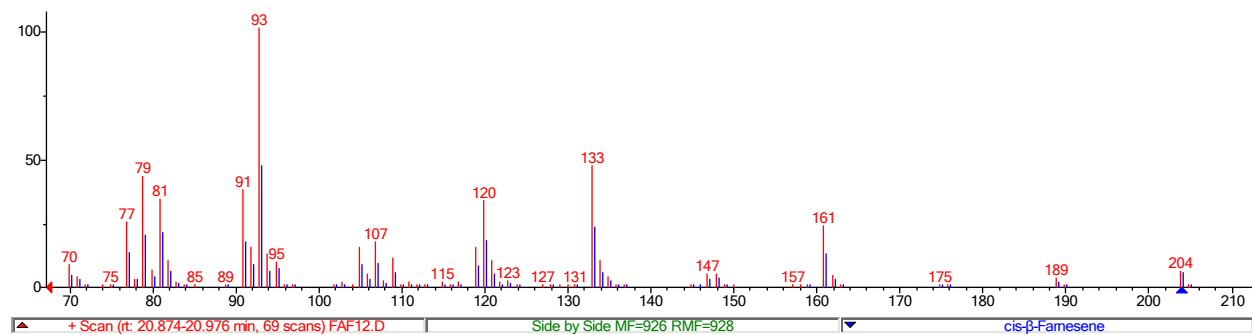

V3

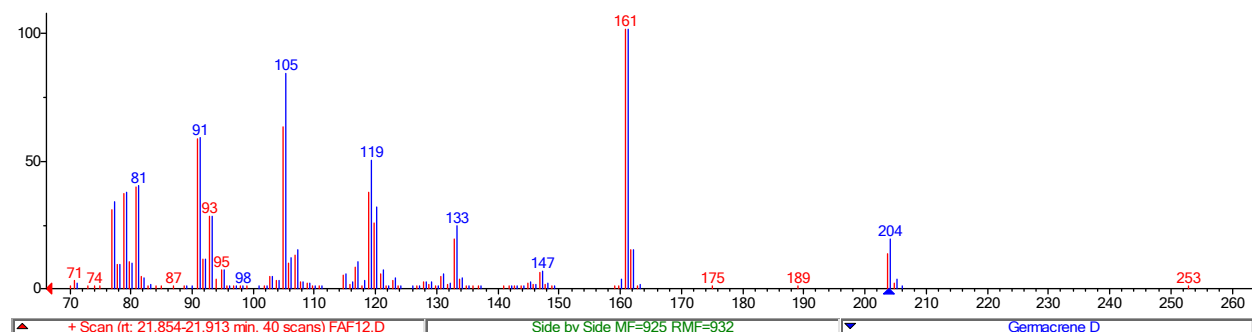

V4.

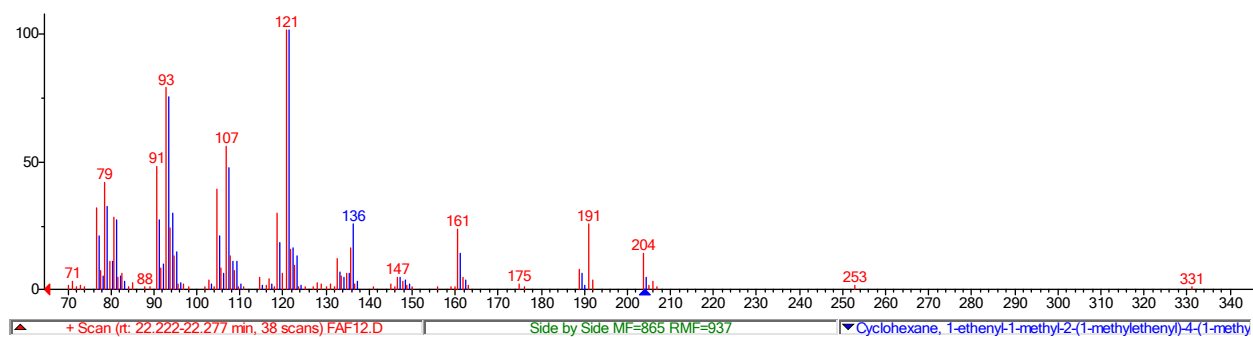

V5

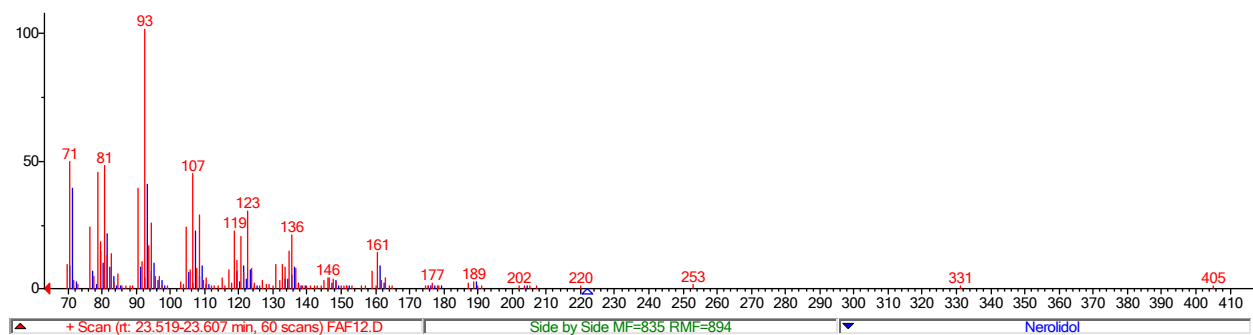

V6

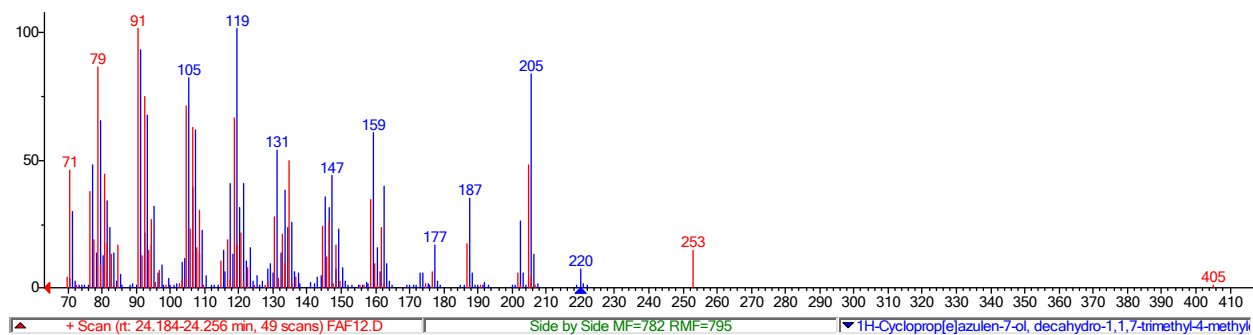

V7.

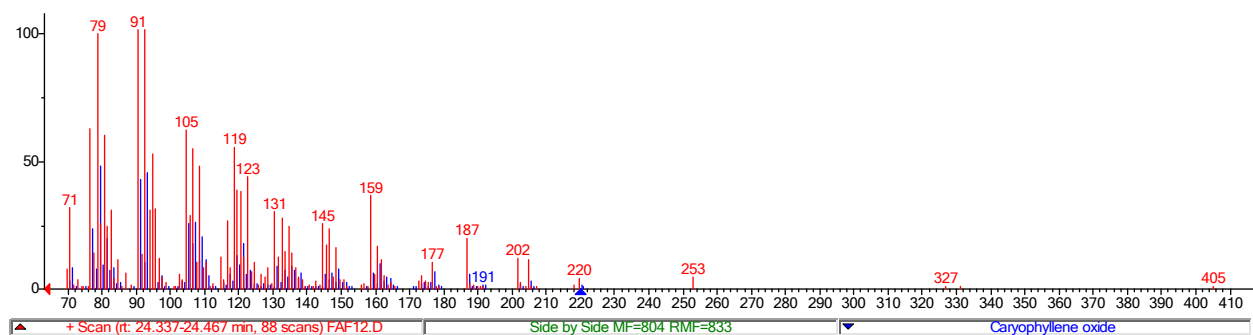

V8

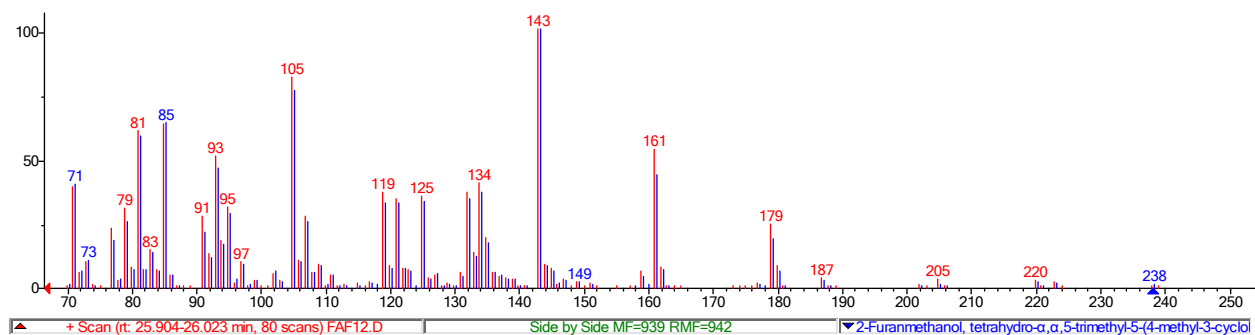

V9

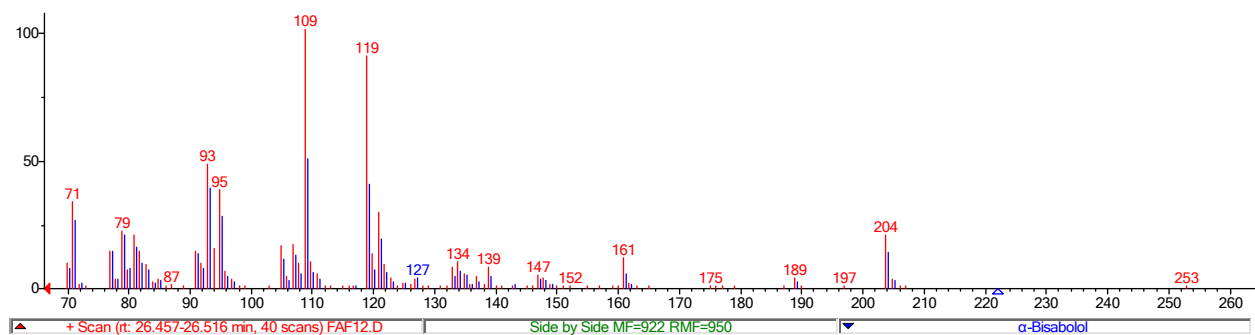

V10

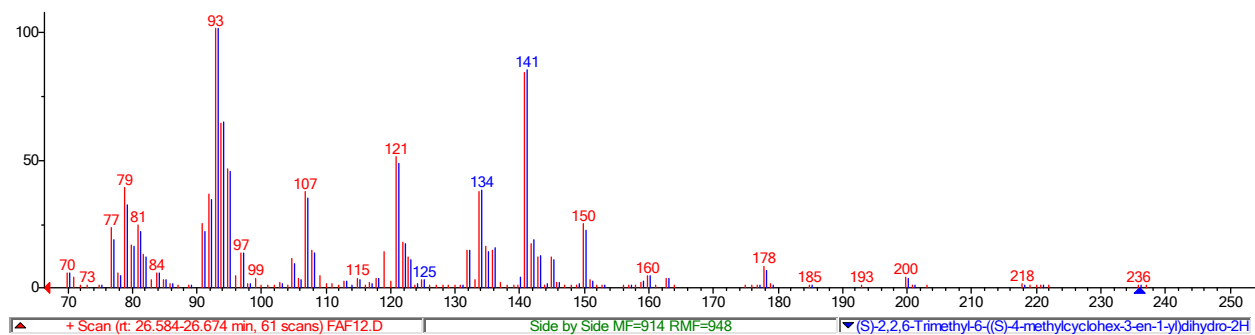

V11

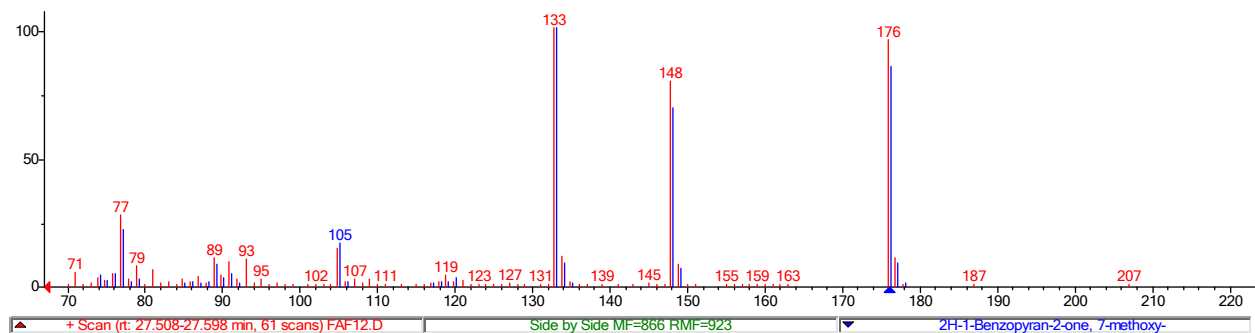

V12

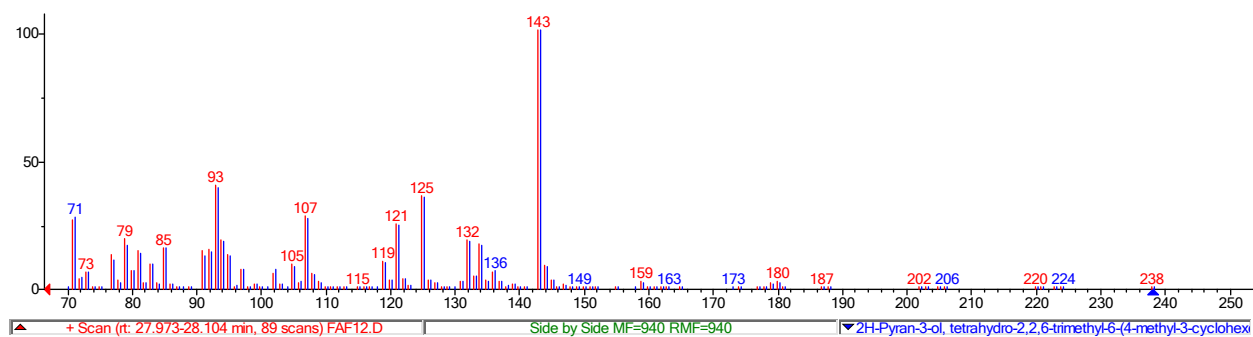

V13

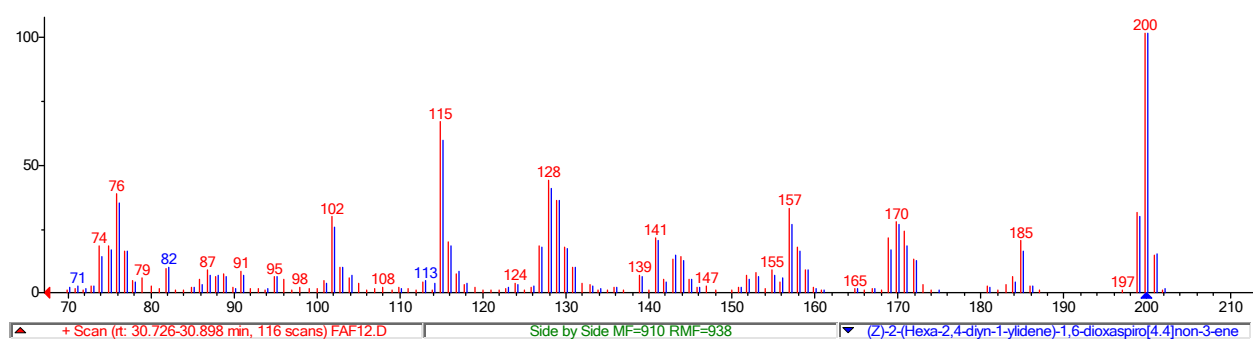

V14

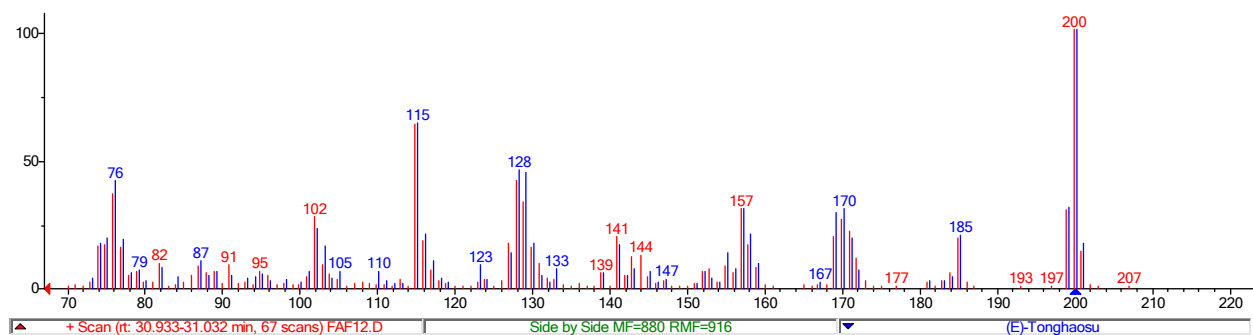

V15

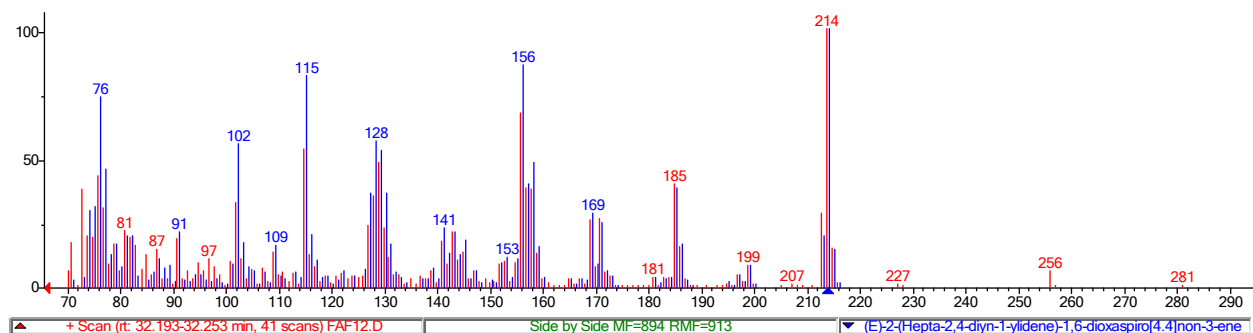

V16

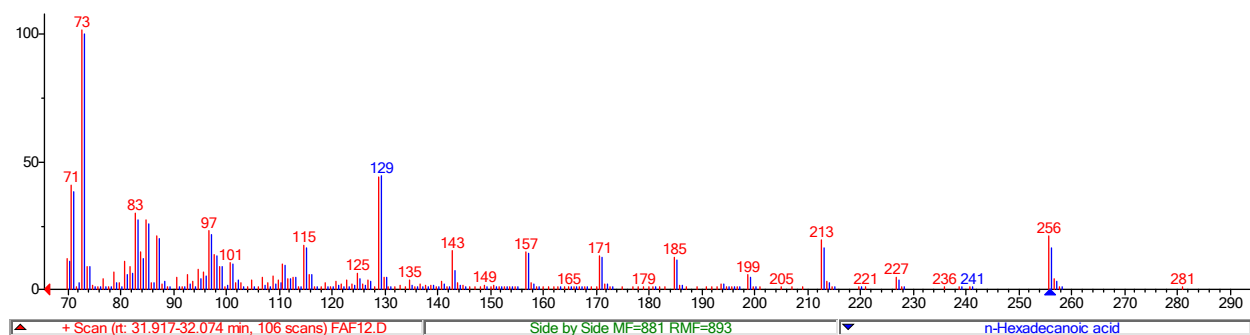

V17

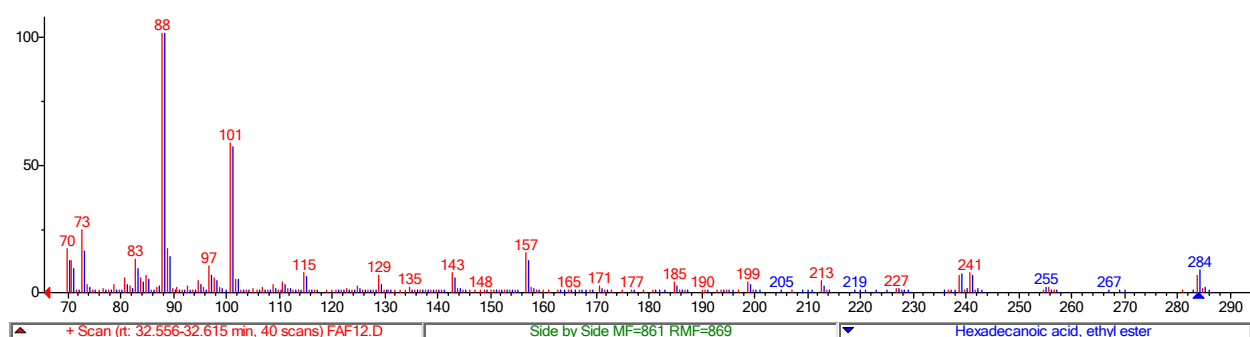

V18

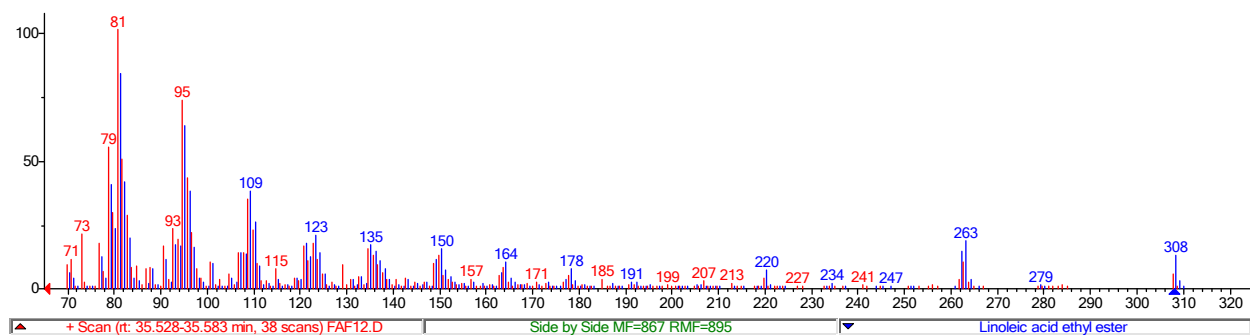

V19

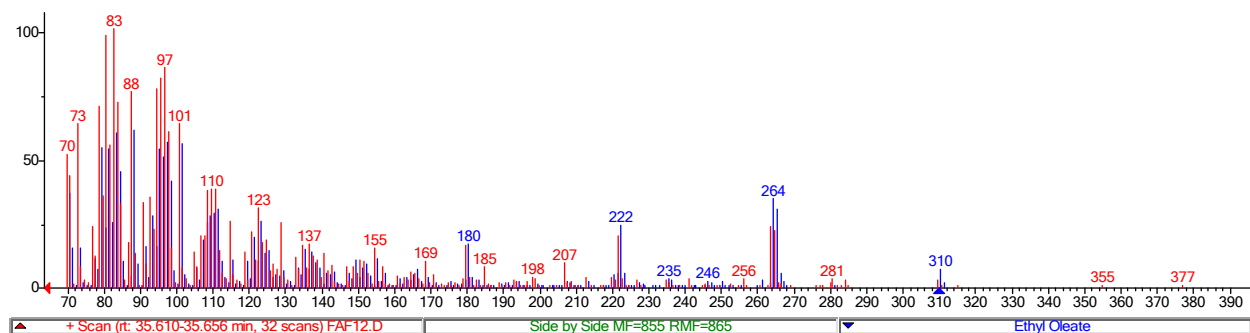

V20

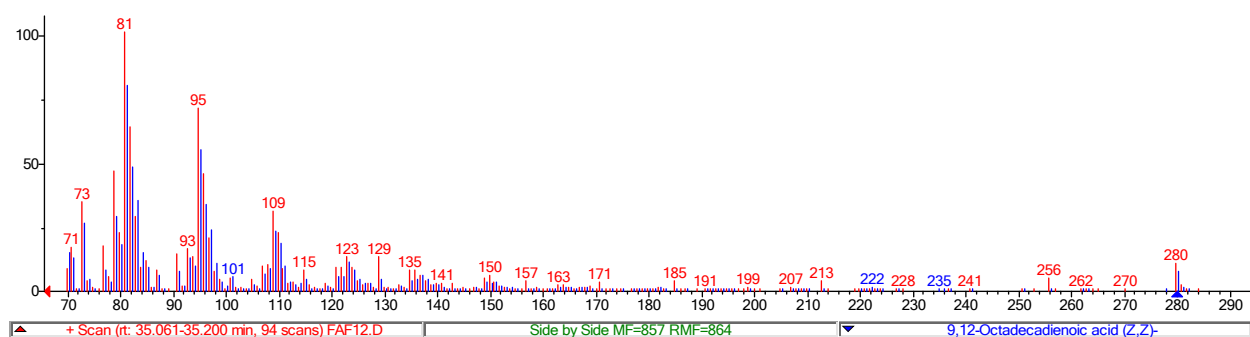

V21

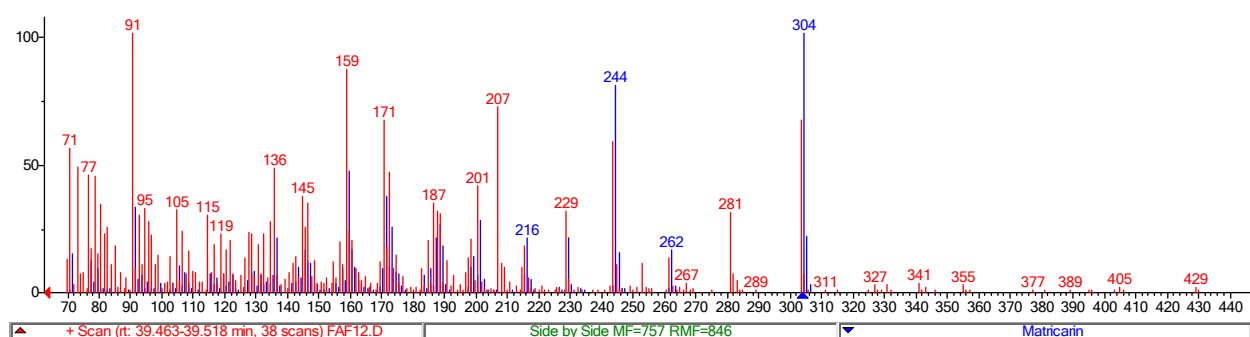

V22

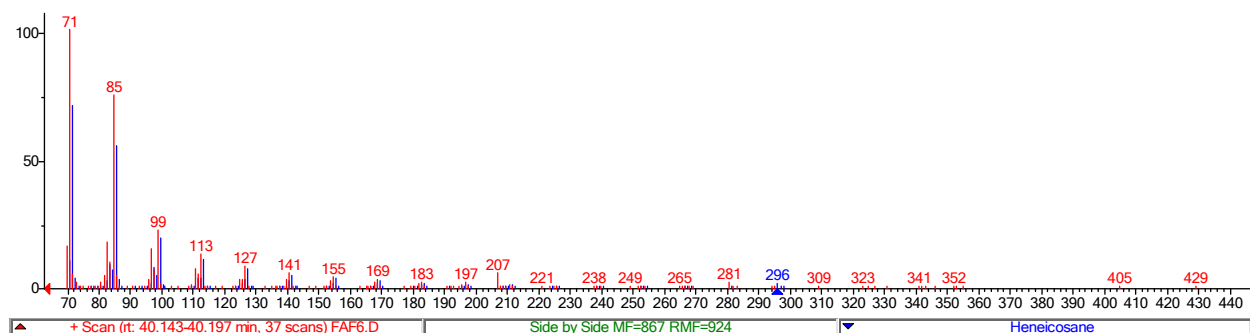

V23

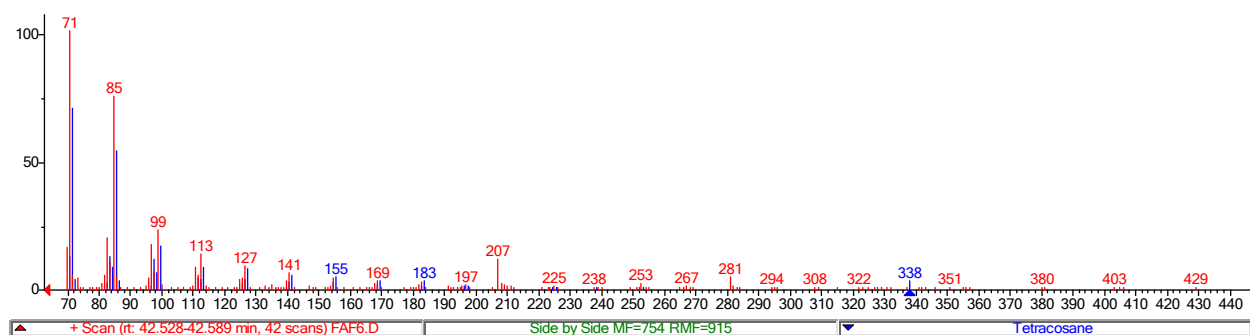

V24

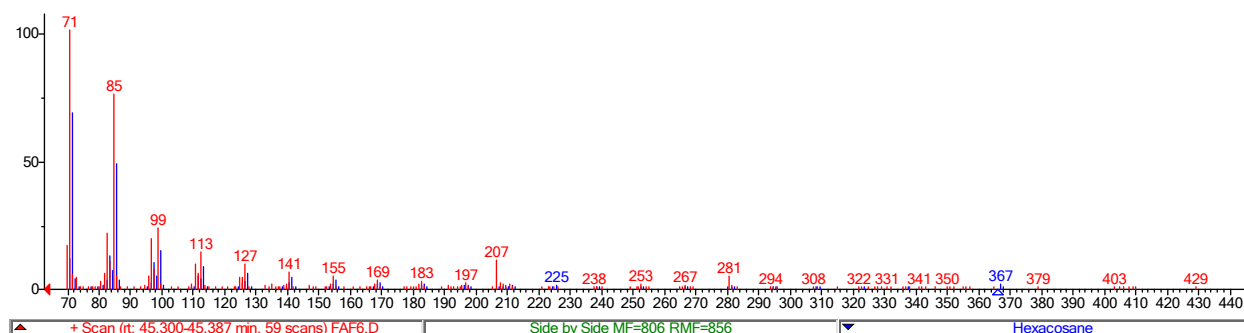

V25

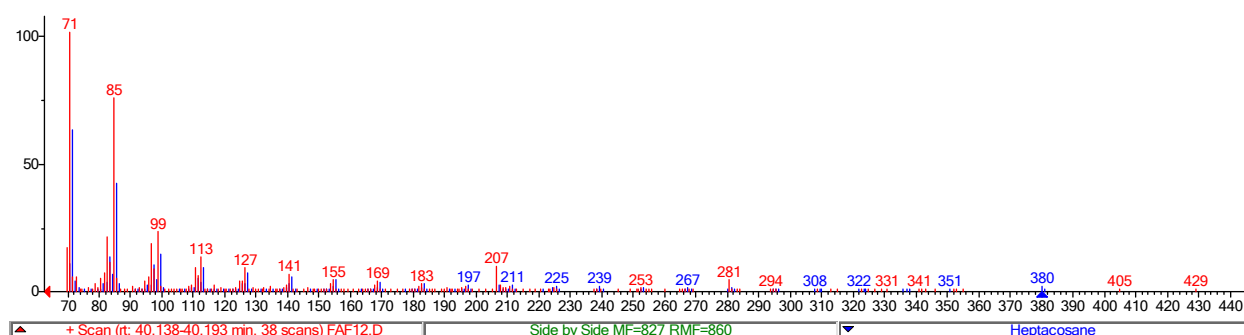

V26

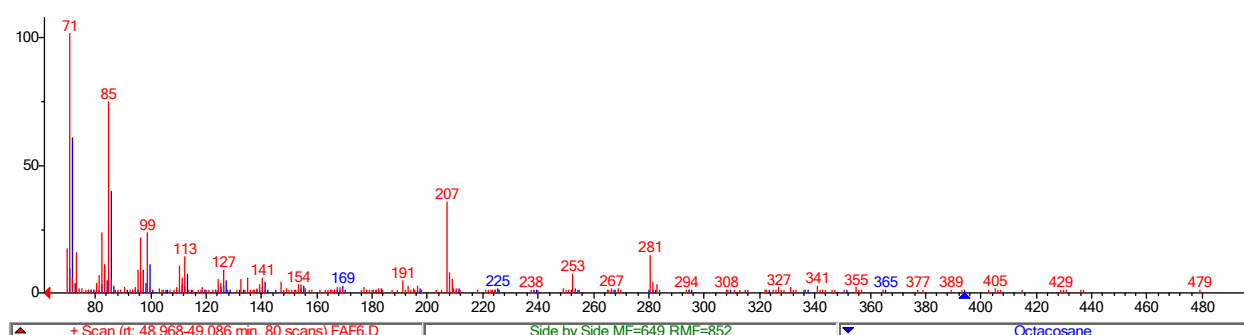

V27

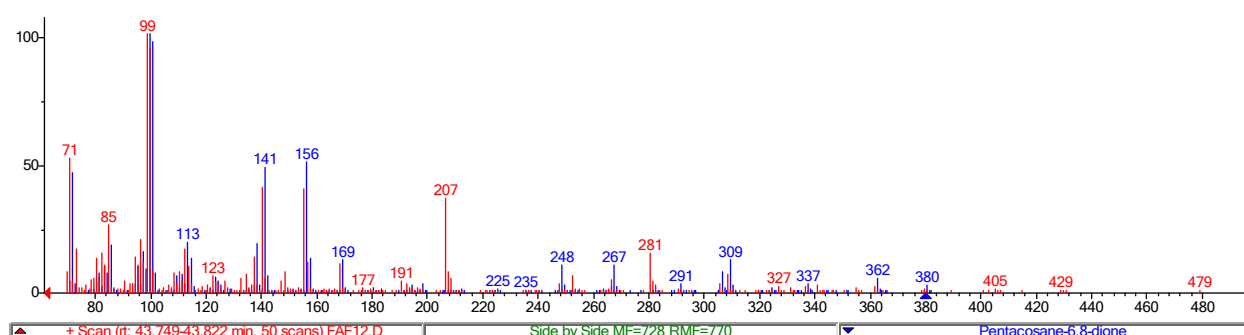

V28

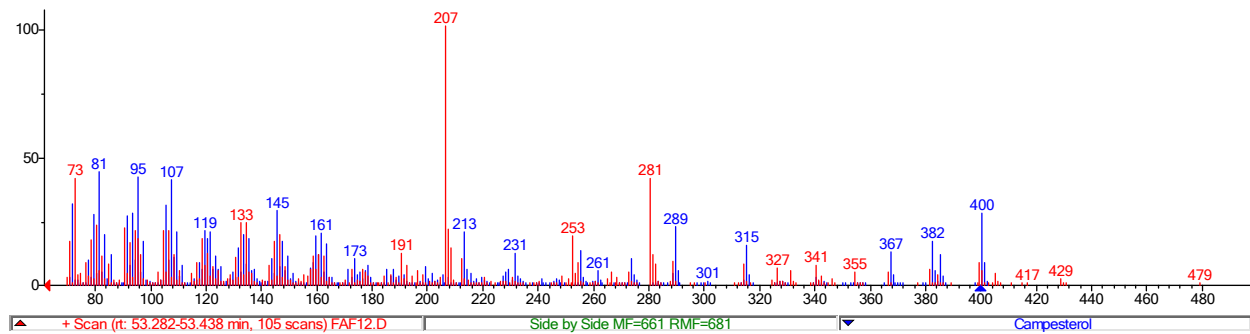

V29

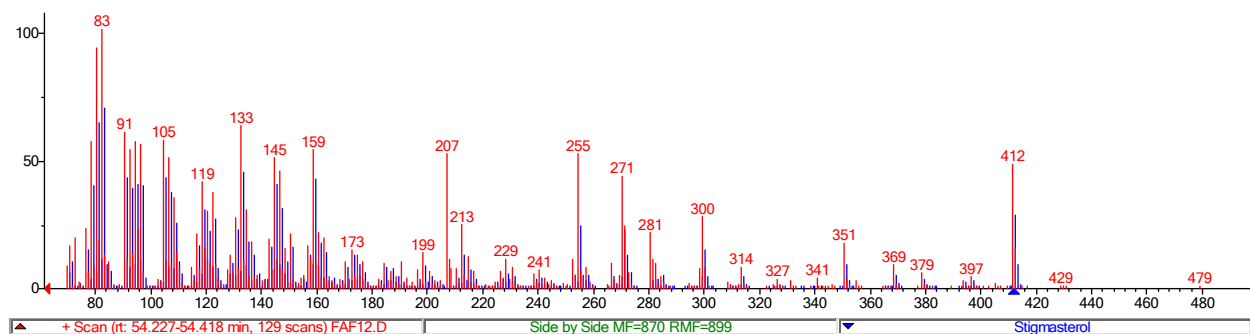

V30

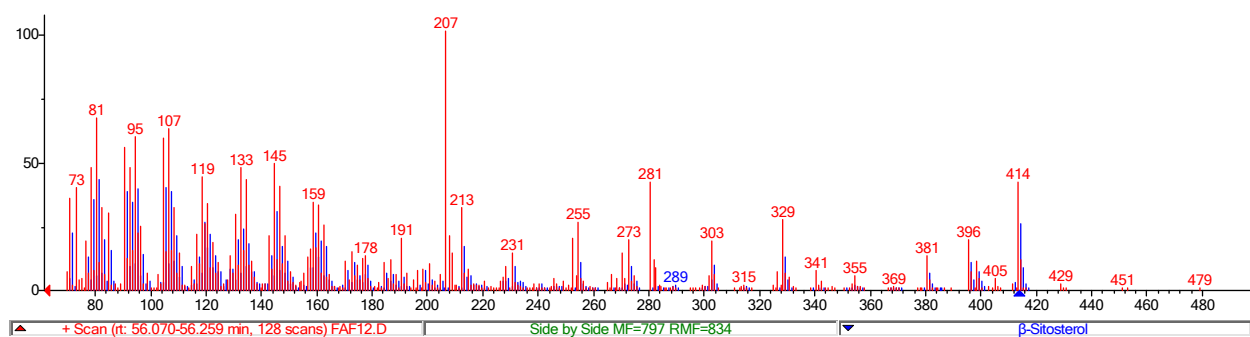

V31

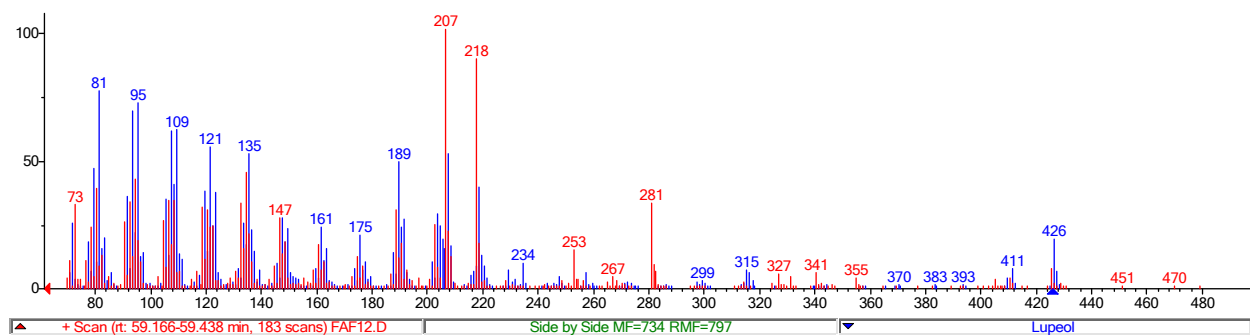

V32



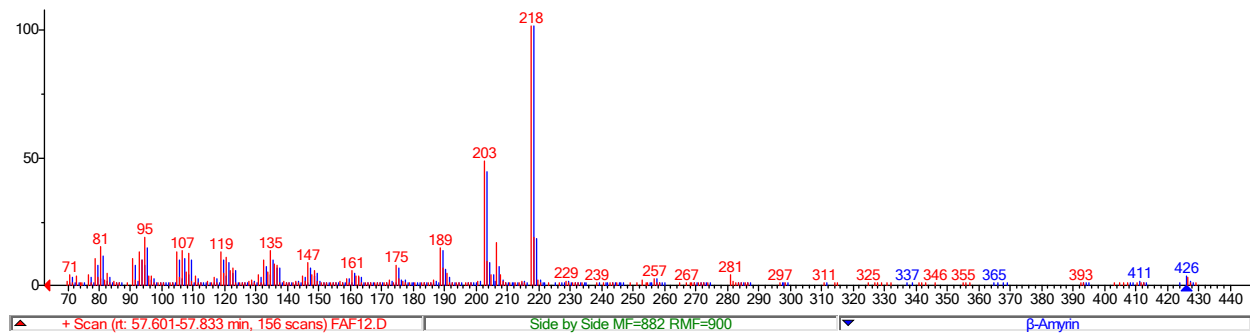

V33

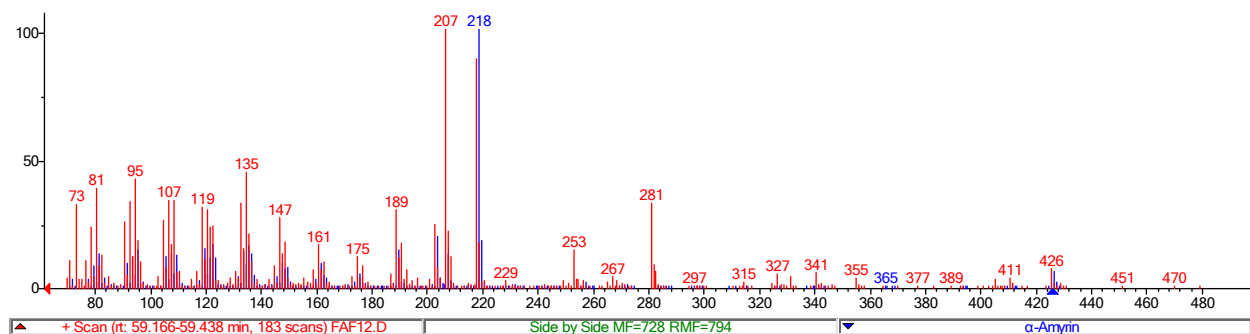

V34

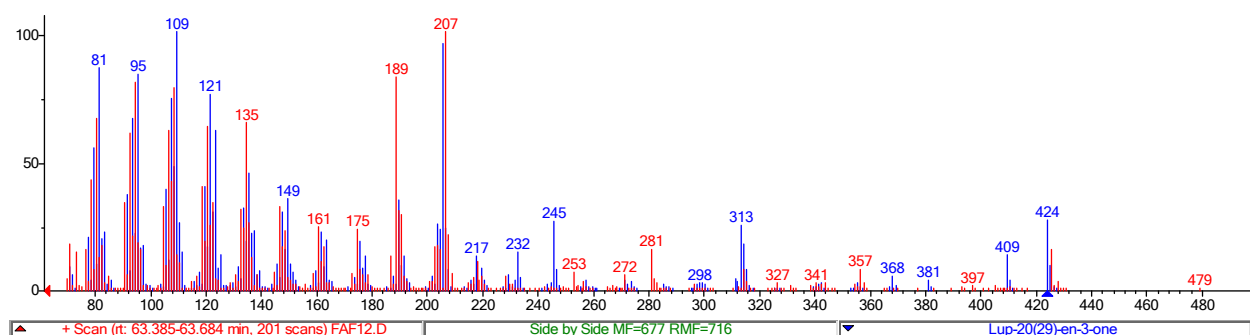

V35

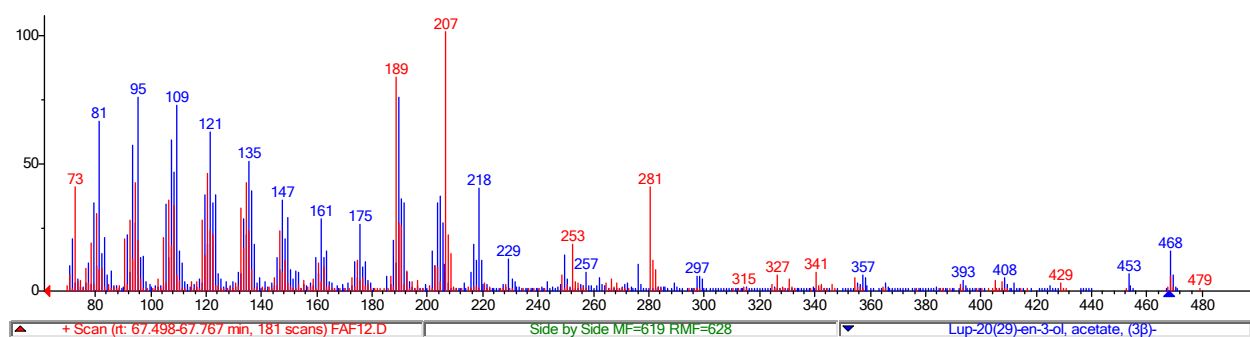

V36

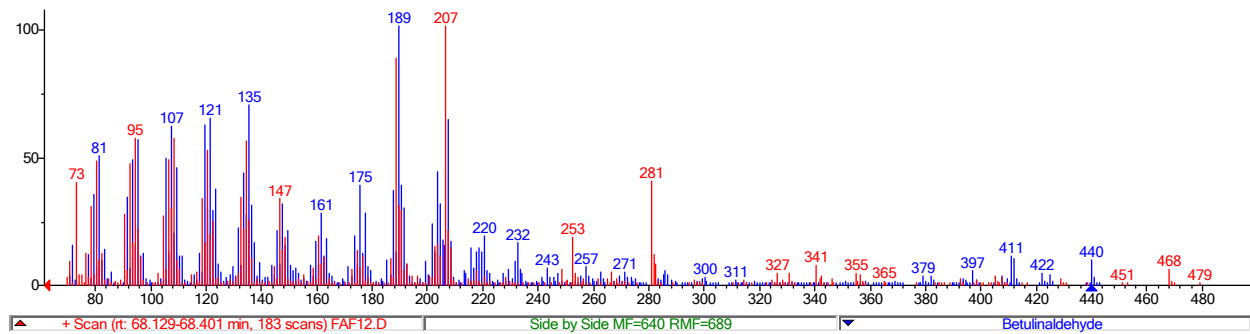

V37
