# Supplementary material for: Exploring the Potential of Supercritical Fluid Extraction of Matricaria chamomilla White Ray Florets as a Source of Bioactive (Cosmetic) Ingredients
Source: MDPI journal article supplement (doi:10.3390/antiox12051092), 2023-05-12
Supplement: s1 [file s1]

**Table S3.** LC-qTOF-MS data of selected nonvolatile compounds detected in *Matricaria chamomilla* white ray floret supercritical fluid extracts in positive ionization mode.

|                                                             | Extract                                                            | FAF1                                           | FAF2       | FAF3       | FAF4       | FAF5      | FAF6       | FAF7       | FAF8       | FAF9      | FAF10      | FAF11      | FAF12      | FAF13      |
|-------------------------------------------------------------|--------------------------------------------------------------------|------------------------------------------------|------------|------------|------------|-----------|------------|------------|------------|-----------|------------|------------|------------|------------|
| Number                                                      | Proposed compound                                                  | Amino acids <sup>a</sup> , µg mL <sup>-1</sup> |            |            |            |           |            |            |            |           |            |            |            |            |
| AA1                                                         | Proline betaine                                                    | 0.75±0.15                                      | 2.70±0.31  | 2.35±0.33  | 2.87±0.18  | 1.61±0.24 | 0.16±0.01  | 0.13±0.01  | -          | 0.06±0.00 | 0.40±0.03  | 0.08±0.01  | 0.42±0.02  | 0.37±0.02  |
| AA2                                                         | (S)-Homostachydrine                                                | 0.62±0.08                                      | 2.38±0.28  | 0.16±0.01  | 2.30±0.25  | 0.74±0.16 | 0.05±0.00  | 0.05±0.00  | -          | -         | 0.01±0.00  | 0.03±0.00  | 0.16±0.01  | 0.13±0.01  |
| AA3                                                         | Leucine/Isoleucine                                                 | 1.09±0.09                                      | 4.16±0.36  | 1.91±0.05  | 3.36±0.27  | 0.62±0.11 | 0.10±0.00  | 0.12±0.01  | -          | -         | 0.20±0.01  | 0.05±0.00  | 0.13±0.01  | 0.22±0.01  |
| AA4                                                         | Prolyl-Histidine                                                   | 0.22±0.01                                      | 0.88±0.14  | 0.38±0.02  | 0.82±0.12  | -         | -          | -          | -          | -         | -          | -          | -          | -          |
| AA5                                                         | Phenylalanine                                                      | 0.35±0.02                                      | 0.72±0.06  | 0.37±0.02  | 0.67±0.11  | 0.17±0.01 | 0.38±0.02  | 0.01±0.00  | 0.31±0.02  | -         | 0.71±0.04  | 0.34±0.02  | 2.31±0.17  | 0.70±0.13  |
| AA6                                                         | H-DL-Leu-DL-Met-DL-Pro-DL-Pro-OH                                   | 0.15±0.01                                      | 0.59±0.02  | 0.10±0.01  | 0.29±0.05  | 0.04±0.00 | -          | -          | -          | -         | 0.01±0.00  | -          | 0.03±0.00  | -          |
|                                                             | Total                                                              | 3.18±0.06                                      | 11.43±0.14 | 5.27±0.13  | 10.30±0.09 | 3.17±0.10 | 0.68±0.01  | 0.31±0.02  | 0.31±0.02  | 0.06±0.00 | 1.33±0.02  | 0.49±0.01  | 3.05±0.07  | 1.43±0.06  |
| Ferulic acid derivatives <sup>b</sup> , µg mL <sup>-1</sup> |                                                                    |                                                |            |            |            |           |            |            |            |           |            |            |            |            |
| FA1                                                         | Ferulic acid -O-glucoside I                                        | -                                              | -          | 3.80±0.52  | -          | -         | -          | -          | -          | -         | -          | -          | -          | -          |
| FA2                                                         | Ferulic acid -O-glucoside II                                       | 2.96±0.35                                      | 11.16±0.85 | 8.79±0.64  | 10.64±1.23 | 4.39±1.05 | 0.26±0.03  | 0.08±0.01  | 0.34±0.05  | 0.13±0.01 | 0.30±0.02  | 0.30±0.04  | -          | 0.35±0.01  |
| FA3                                                         | Ferulic acid -O-glucoside III                                      | 0.85±0.13                                      | 2.92±0.32  | 2.14±0.35  | 2.89±0.65  | 0.71±0.15 | 0.03±0.00  | -          | 0.43±0.07  | -         | -          | 0.23±0.02  | -          | -          |
|                                                             | Total                                                              | 3.80±0.16                                      | 14.08±0.37 | 14.74±0.15 | 13.54±0.41 | 5.11±0.64 | 0.29±0.02  | 0.08±0.01  | 0.77±0.01  | 0.13±0.01 | 0.30±0.02  | 0.53±0.01  | -          | 0.35±0.01  |
| Coumarin derivatives <sup>c</sup> , µg mL <sup>-1</sup>     |                                                                    |                                                |            |            |            |           |            |            |            |           |            |            |            |            |
| COU1                                                        | Skimmin                                                            | 0.86±0.17                                      | 3.42±0.24  | 2.24±0.13  | 3.34±0.33  | 0.79±0.14 | -          | -          | -          | -         | -          | -          | -          | -          |
| COU2                                                        | Umbelliferone                                                      | 1.54±0.23                                      | 4.42±0.32  | 0.54±0.06  | 1.49±0.10  | 0.35±0.06 | 0.92±0.19  | 0.28±0.04  | 0.55±0.16  | 0.51±0.07 | 1.87±0.24  | 0.74±0.15  | 6.53±0.44  | 2.35±0.25  |
| COU3                                                        | Herniarin                                                          | 16.59±2.37                                     | 11.35±0.57 | 5.21±0.64  | 1.62±0.18  | 6.63±0.58 | 28.36±1.27 | 11.92±0.88 | 14.75±0.97 | 6.12±0.39 | 34.94±1.83 | 21.56±1.34 | 43.28±1.51 | 35.85±1.13 |
| COU4                                                        | (3'x,5'a,9'x,10'b)-O-(3-Hydroxy-6-oxo-7-drimen-11-yl)umbelliferone | 0.77±0.12                                      | 3.06±0.22  | 1.44±0.26  | 2.16±0.23  | 0.35±0.08 | -          | -          | -          | -         | 0.10±0.00  | -          | 0.20±0.01  | -          |
|                                                             | Total                                                              | 19.76±1.03                                     | 22.25±0.16 | 9.42±0.26  | 8.62±0.10  | 8.12±0.25 | 29.27±0.76 | 12.20±0.49 | 15.31±0.57 | 6.63±0.23 | 36.91±0.99 | 22.29±0.84 | 50.01±0.77 | 38.20±0.62 |
| Apigenin derivatives <sup>d</sup> , µg mL <sup>-1</sup>     |                                                                    |                                                |            |            |            |           |            |            |            |           |            |            |            |            |
| API1                                                        | Apigenin 7-O-glucoside                                             | 1.88±0.16                                      | 6.87±0.33  | 7.48±0.54  | 6.57±0.52  | 3.78±0.19 | 0.66±0.12  | -          | -          | -         | -          | 0.33±0.03  | -          | -          |
| API2                                                        | Apigenin-7-O-(6"-acetyl-gulcoside)                                 | 1.21±0.13                                      | 4.41±0.25  | 3.75±0.46  | 3.46±0.49  | 1.26±0.22 | 0.21±0.01  | 0.21±0.02  | -          | -         | -          | 0.10±0.00  | -          | -          |
| API3                                                        | Apigenin-7-O-(4"-acetyl-gulcoside)                                 | 0.57±0.10                                      | 2.02±0.17  | 1.82±0.83  | 1.83±0.22  | 0.65±0.05 | 0.11±0.01  | 0.15±0.01  | -          | -         | -          | 0.06±0.00  | -          | -          |
| API4                                                        | Apigenin-7-O-(6"-malonyl,4"-acetyl-gulcoside)                      | 1.24±0.11                                      | 4.17±0.33  | 4.79±0.67  | 3.42±0.31  | 2.18±0.16 | 0.29±0.08  | 0.52±0.09  | -          | -         | 0.04±0.00  | 0.15±0.01  | 0.05±0.00  | 0.05±0.00  |
| API5                                                        | Apigenin-7-O-(4"-malonyl,6"-acetyl-gulcoside)                      | 6.05±0.37                                      | 23.86±1.02 | 2.53±0.23  | 1.80±0.17  | 0.90±0.12 | 0.14±0.01  | 0.22±0.01  | -          | -         | 0.01±0.00  | 0.07±0.01  | 0.02±0.00  | 0.02±0.00  |
| API6                                                        | Apigenin                                                           | 1.82±0.42                                      | 7.00±0.66  | 5.19±0.91  | 3.64±0.15  | 1.12±0.28 | 0.29±0.06  | -          | -          | 0.11±0.01 | 0.24±0.02  | 0.15±0.01  | 0.31±0.03  | 0.26±0.02  |
|                                                             | Total                                                              | 12.78±0.14                                     | 48.32±0.32 | 25.55±0.25 | 20.73±0.16 | 9.89±0.08 | 1.70±0.05  | 1.09±0.04  | -          | 0.11±0.01 | 0.29±0.01  | 0.85±0.01  | 0.37±0.02  | 0.32±0.01  |

<sup>a</sup>Leucine equivalents; <sup>b</sup>Ferulic acid equivalents; <sup>c</sup>Coumarin equivalents; <sup>d</sup>Apigenin equivalents; a blank indicates that the compound has not been detected.
