# Supplementary material for: Exploring the Potential of Supercritical Fluid Extraction of Matricaria chamomilla White Ray Florets as a Source of Bioactive (Cosmetic) Ingredients
Source: MDPI journal article supplement (doi:10.3390/antiox12051092), 2023-05-12
Supplement: s1 [file s1]

**Figure S2.** LC-HRMS massspectra for identified compounds in *Matricaria chamomilla* white ray floret supercritical fluid extracts according to Supplementary Table S3.

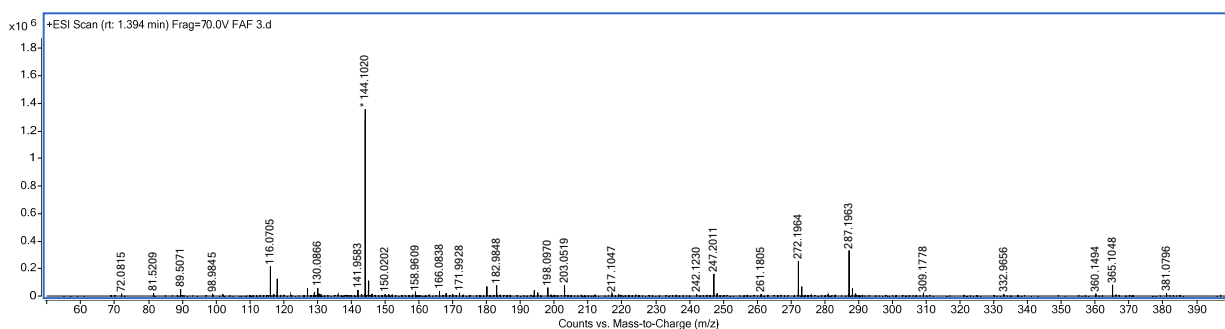

AA1

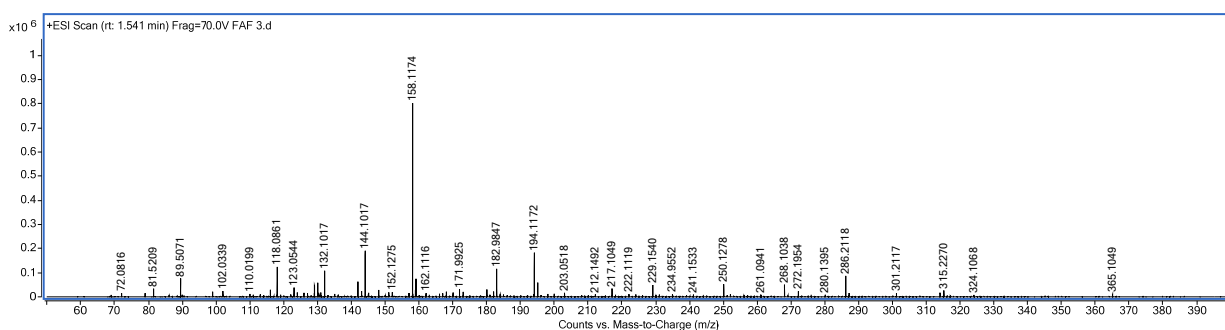

AA2

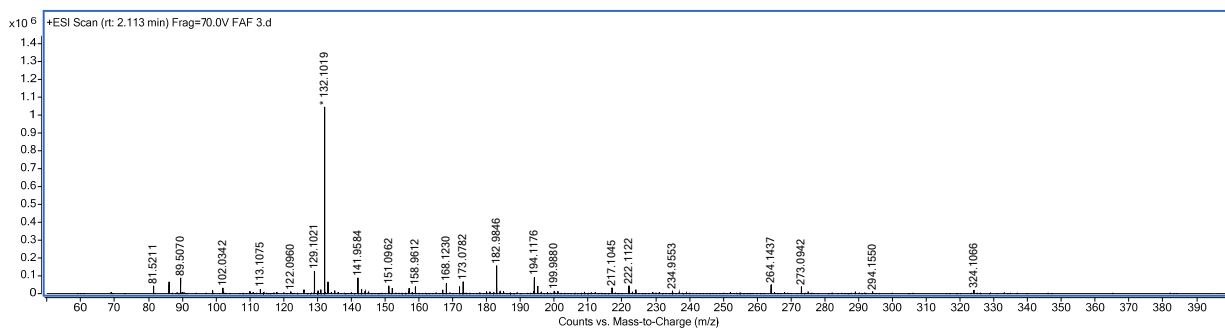

AA3

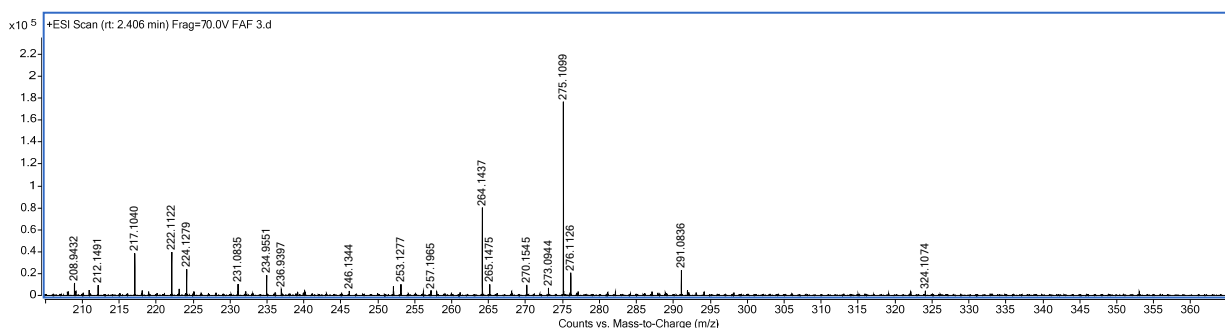

AA4

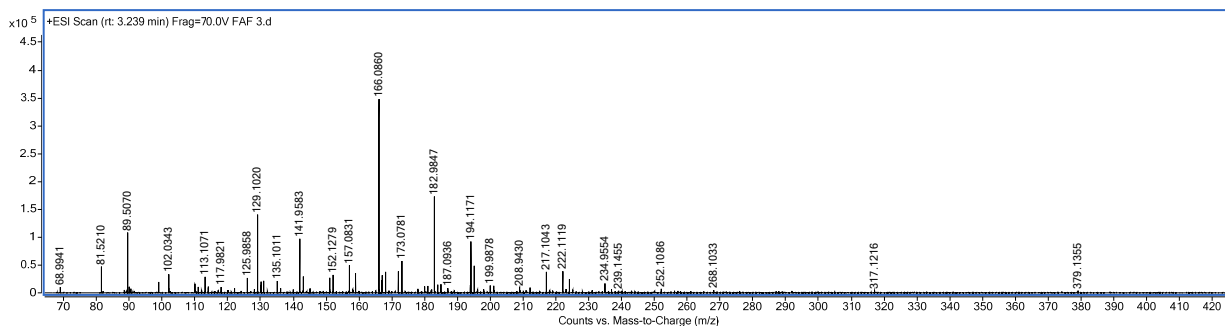

AA5

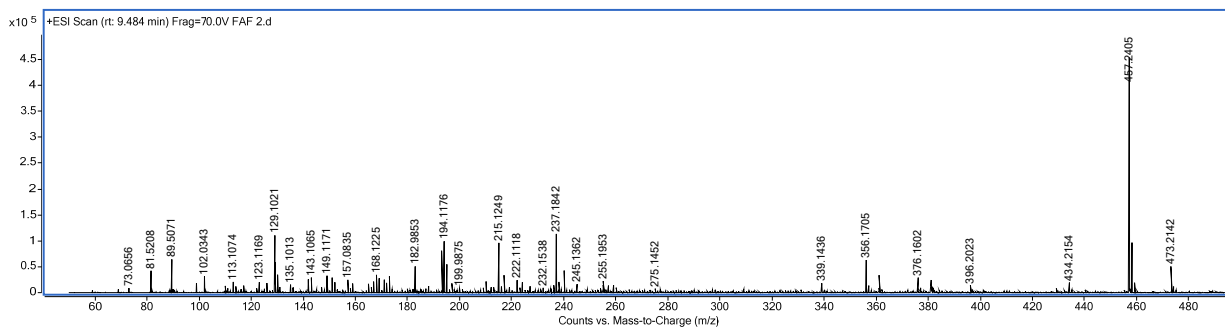

AA6

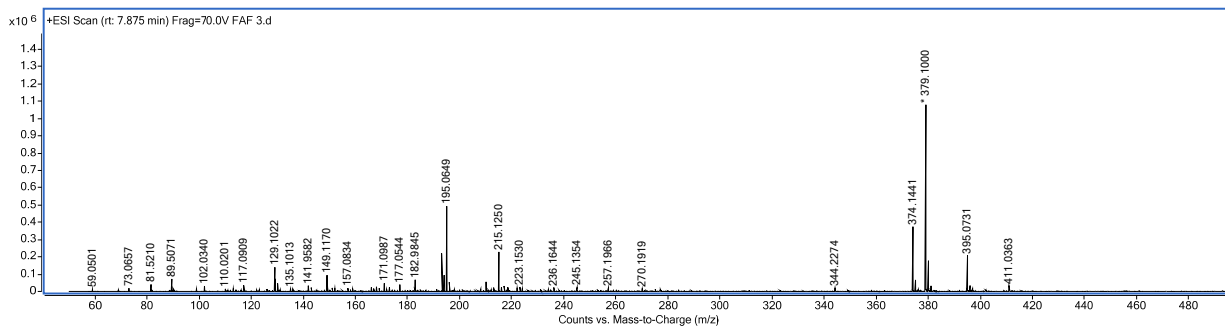

FA1

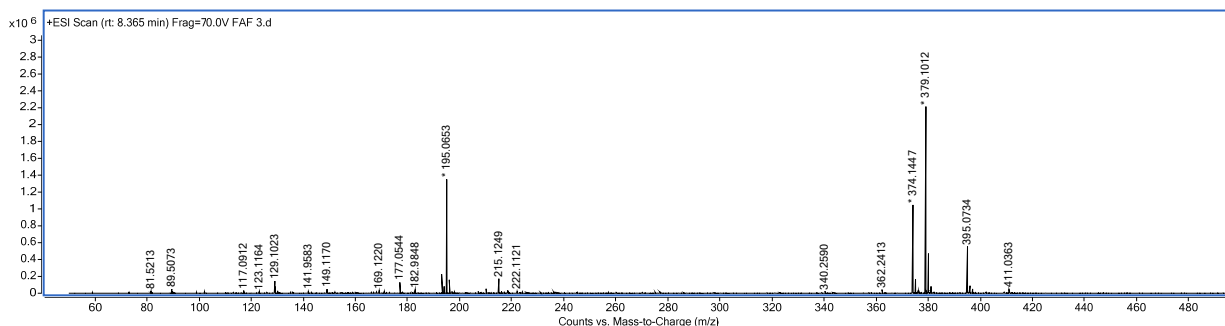

FA2

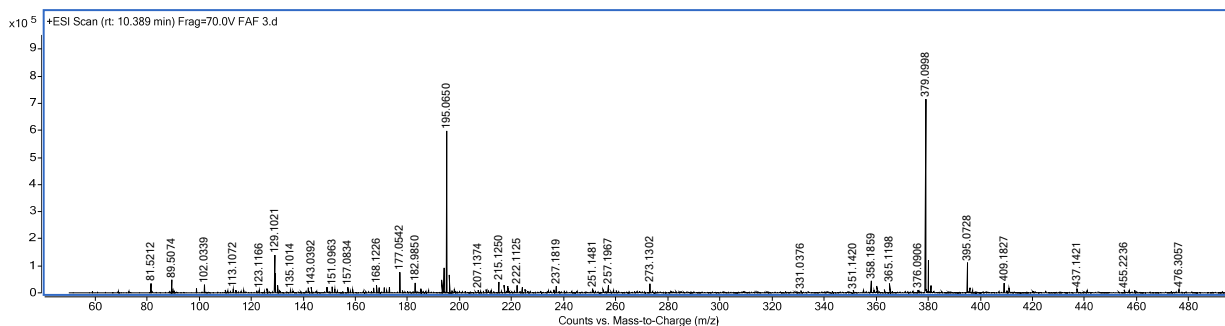

FA3

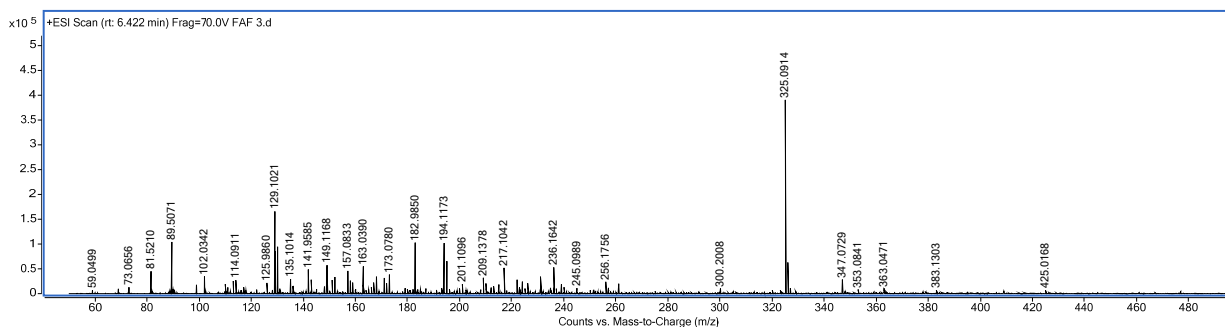

COU1

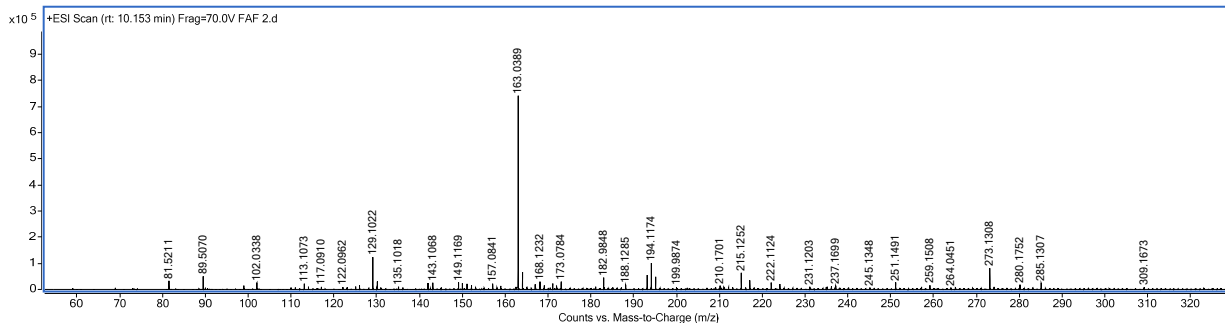

COU2

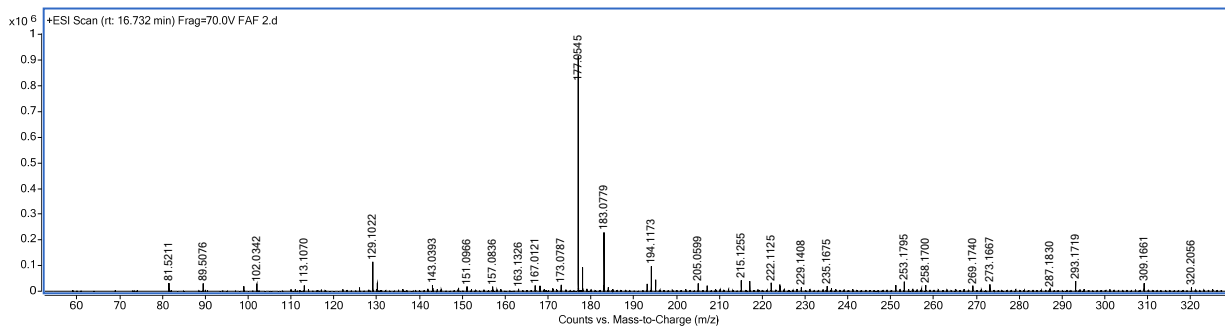

COU3

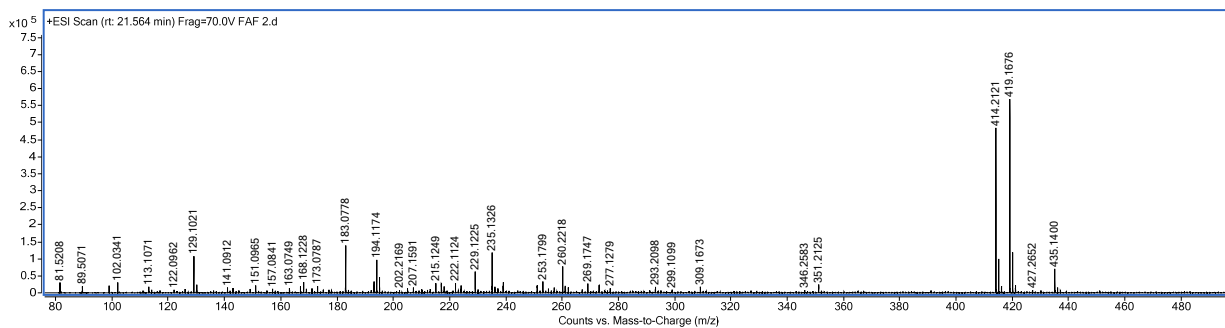

COU4

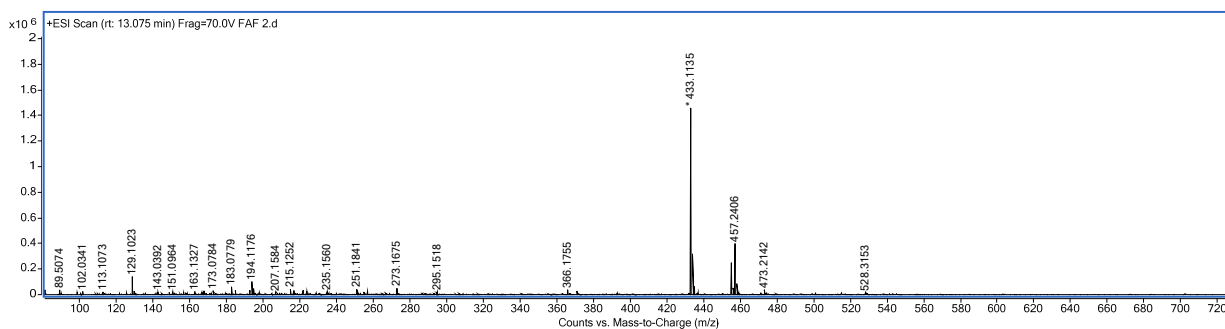

API1

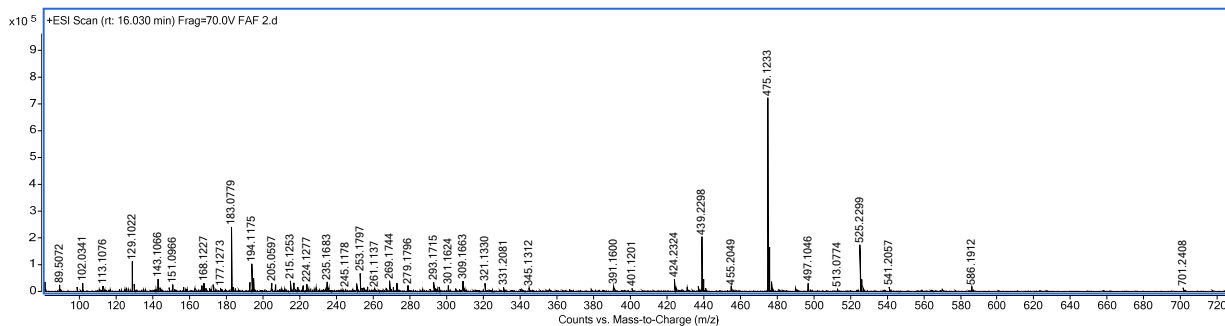

API2

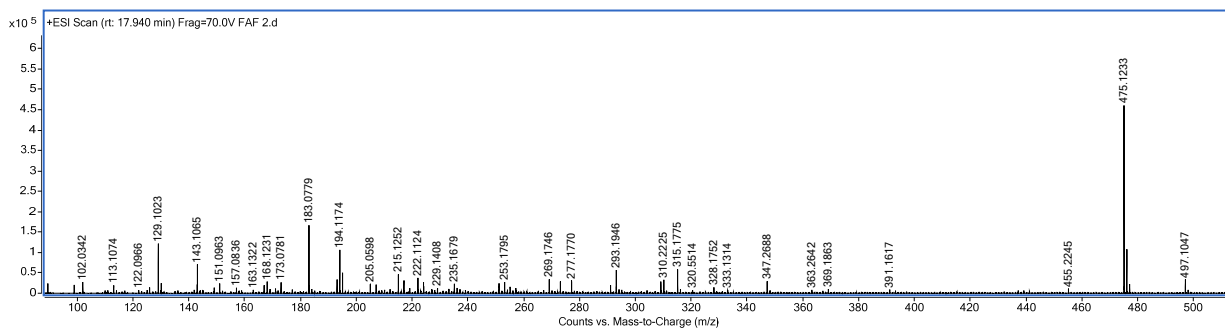

API3

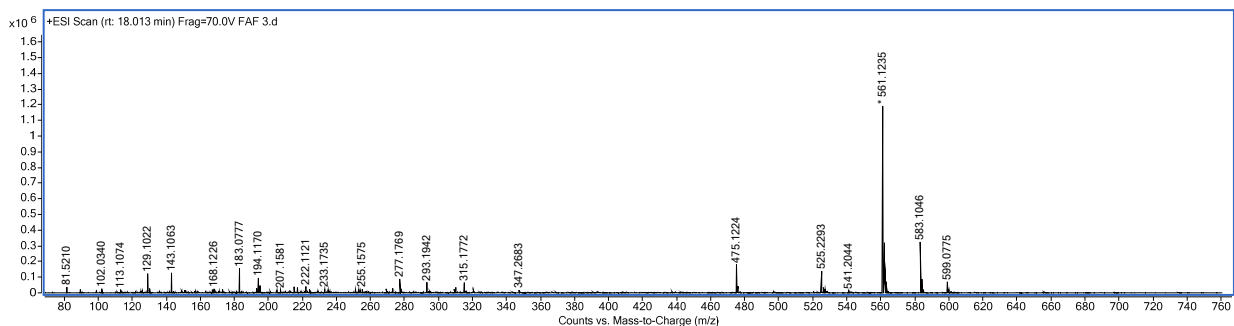

## API4

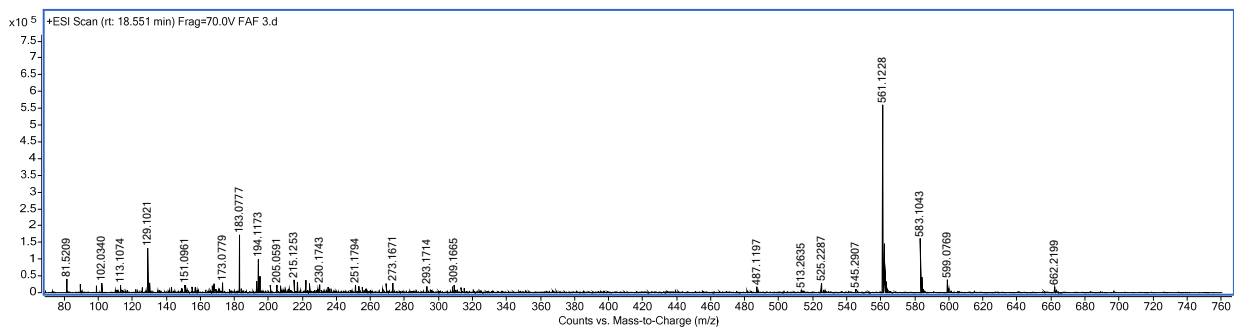

## API5

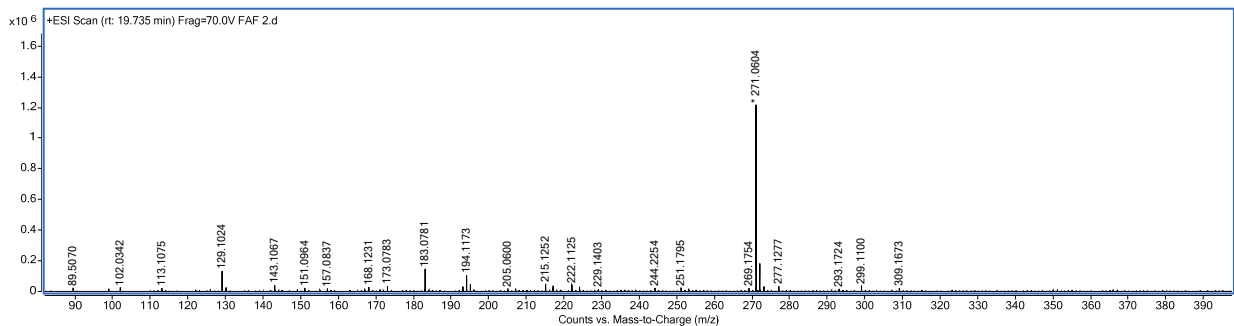

## API6
